# Supplementary material
Source: publisher figshare collection journal article supplement (https://karger.figshare.com/ndownloader/files/37467664)
Supplement: Supplementary file 1 [file 37467664]

**Supplementary File I: Supplementary tables and figures**

Table S1**.** The prevalence rate ratio in the Loess-smoothed age-standardised obesity prevalence between lower (ISCED 0-2) and higher (ISCED 5-6) educated groups from 1978 to 2019 by year, country, and sex.

| Men | 1980 | 1985 | 1990 | 1995 | 2000 | 2005 | 2010 | 2015 | Most recent observation†† |
| --- | --- | --- | --- | --- | --- | --- | --- | --- | --- |
| England* | -- | -- | -- | 1.56 | 1.43 | 1.33 | 1.33 | 1.26 | 1.21 |
| Finland* | 1.46 | 1.49 | 1.55 | 1.61 | 1.60 | 1.58 | 1.56 | -- | 1.55 |
| France | 7.42 | 3.56 | 2.17 | 1.83 | 2.06 | 2.23 | 1.67 | 1.67 | 1.67 |
| Italy | -- | -- | 2.00 | 1.91 | 1.83 | 1.79 | 1.73 | 1.79 | 1.77 |
| Norway | -- | -- | -- | 1.88 | 2.07 | 1.96 | 1.66 | 1.54 | 1.75 |
| USA | -- | -- | -- | -- | 0.87 | 0.95 | 0.94 | 0.86 | 0.84 |
| Women |  |  |  |  |  |  |  |  |  |
| England* | -- | -- | -- | 1.85 | 1.69 | 1.65 | 1.64 | 1.53 | 1.45 |
| Finland* | 1.72 | 1.73 | 1.76 | 1.81 | 1.92 | 1.91 | 1.82 | -- | 1.74 |
| France | 6.60 | 4.37 | 3.05 | 2.68 | 3.49 | 3.59 | 2.17 | 2.35 | 2.42 |
| Italy | **--** | **--** | 4.13 | 3.14 | 2.67 | 2.53 | 2.22 | 2.33 | 2.48 |
| Norway | -- | -- | -- | 3.66 | 1.71 | 1.42 | 1.61 | 1.73 | 1.92 |
| USA | -- | -- | -- | -- | 1.14 | 1.20 | 1.26 | 1.20 | 1.18 |

-- indicates that the year was outside the observation period

* English and Finnish data is unweighted

†Earliest observation: England 1991, Finland 1978, France 1980, Italy 1990, Norway 1995, USA 1999/2000.

††Most recent observations: England 2018, Finland 2014, France 2017, Italy 2018, Norway 2019, USA 2017/2018

Figure S1. Loess-smoothed age-standardised prevalence (%) of obesity (BMI ≥30 kg/m2) in men and women in the six countries under study by educational attainment (lower: ISCED 0-2, middle: ISCED 3-4, higher: ISCED 5-6)from 1978-2019 in colour

**
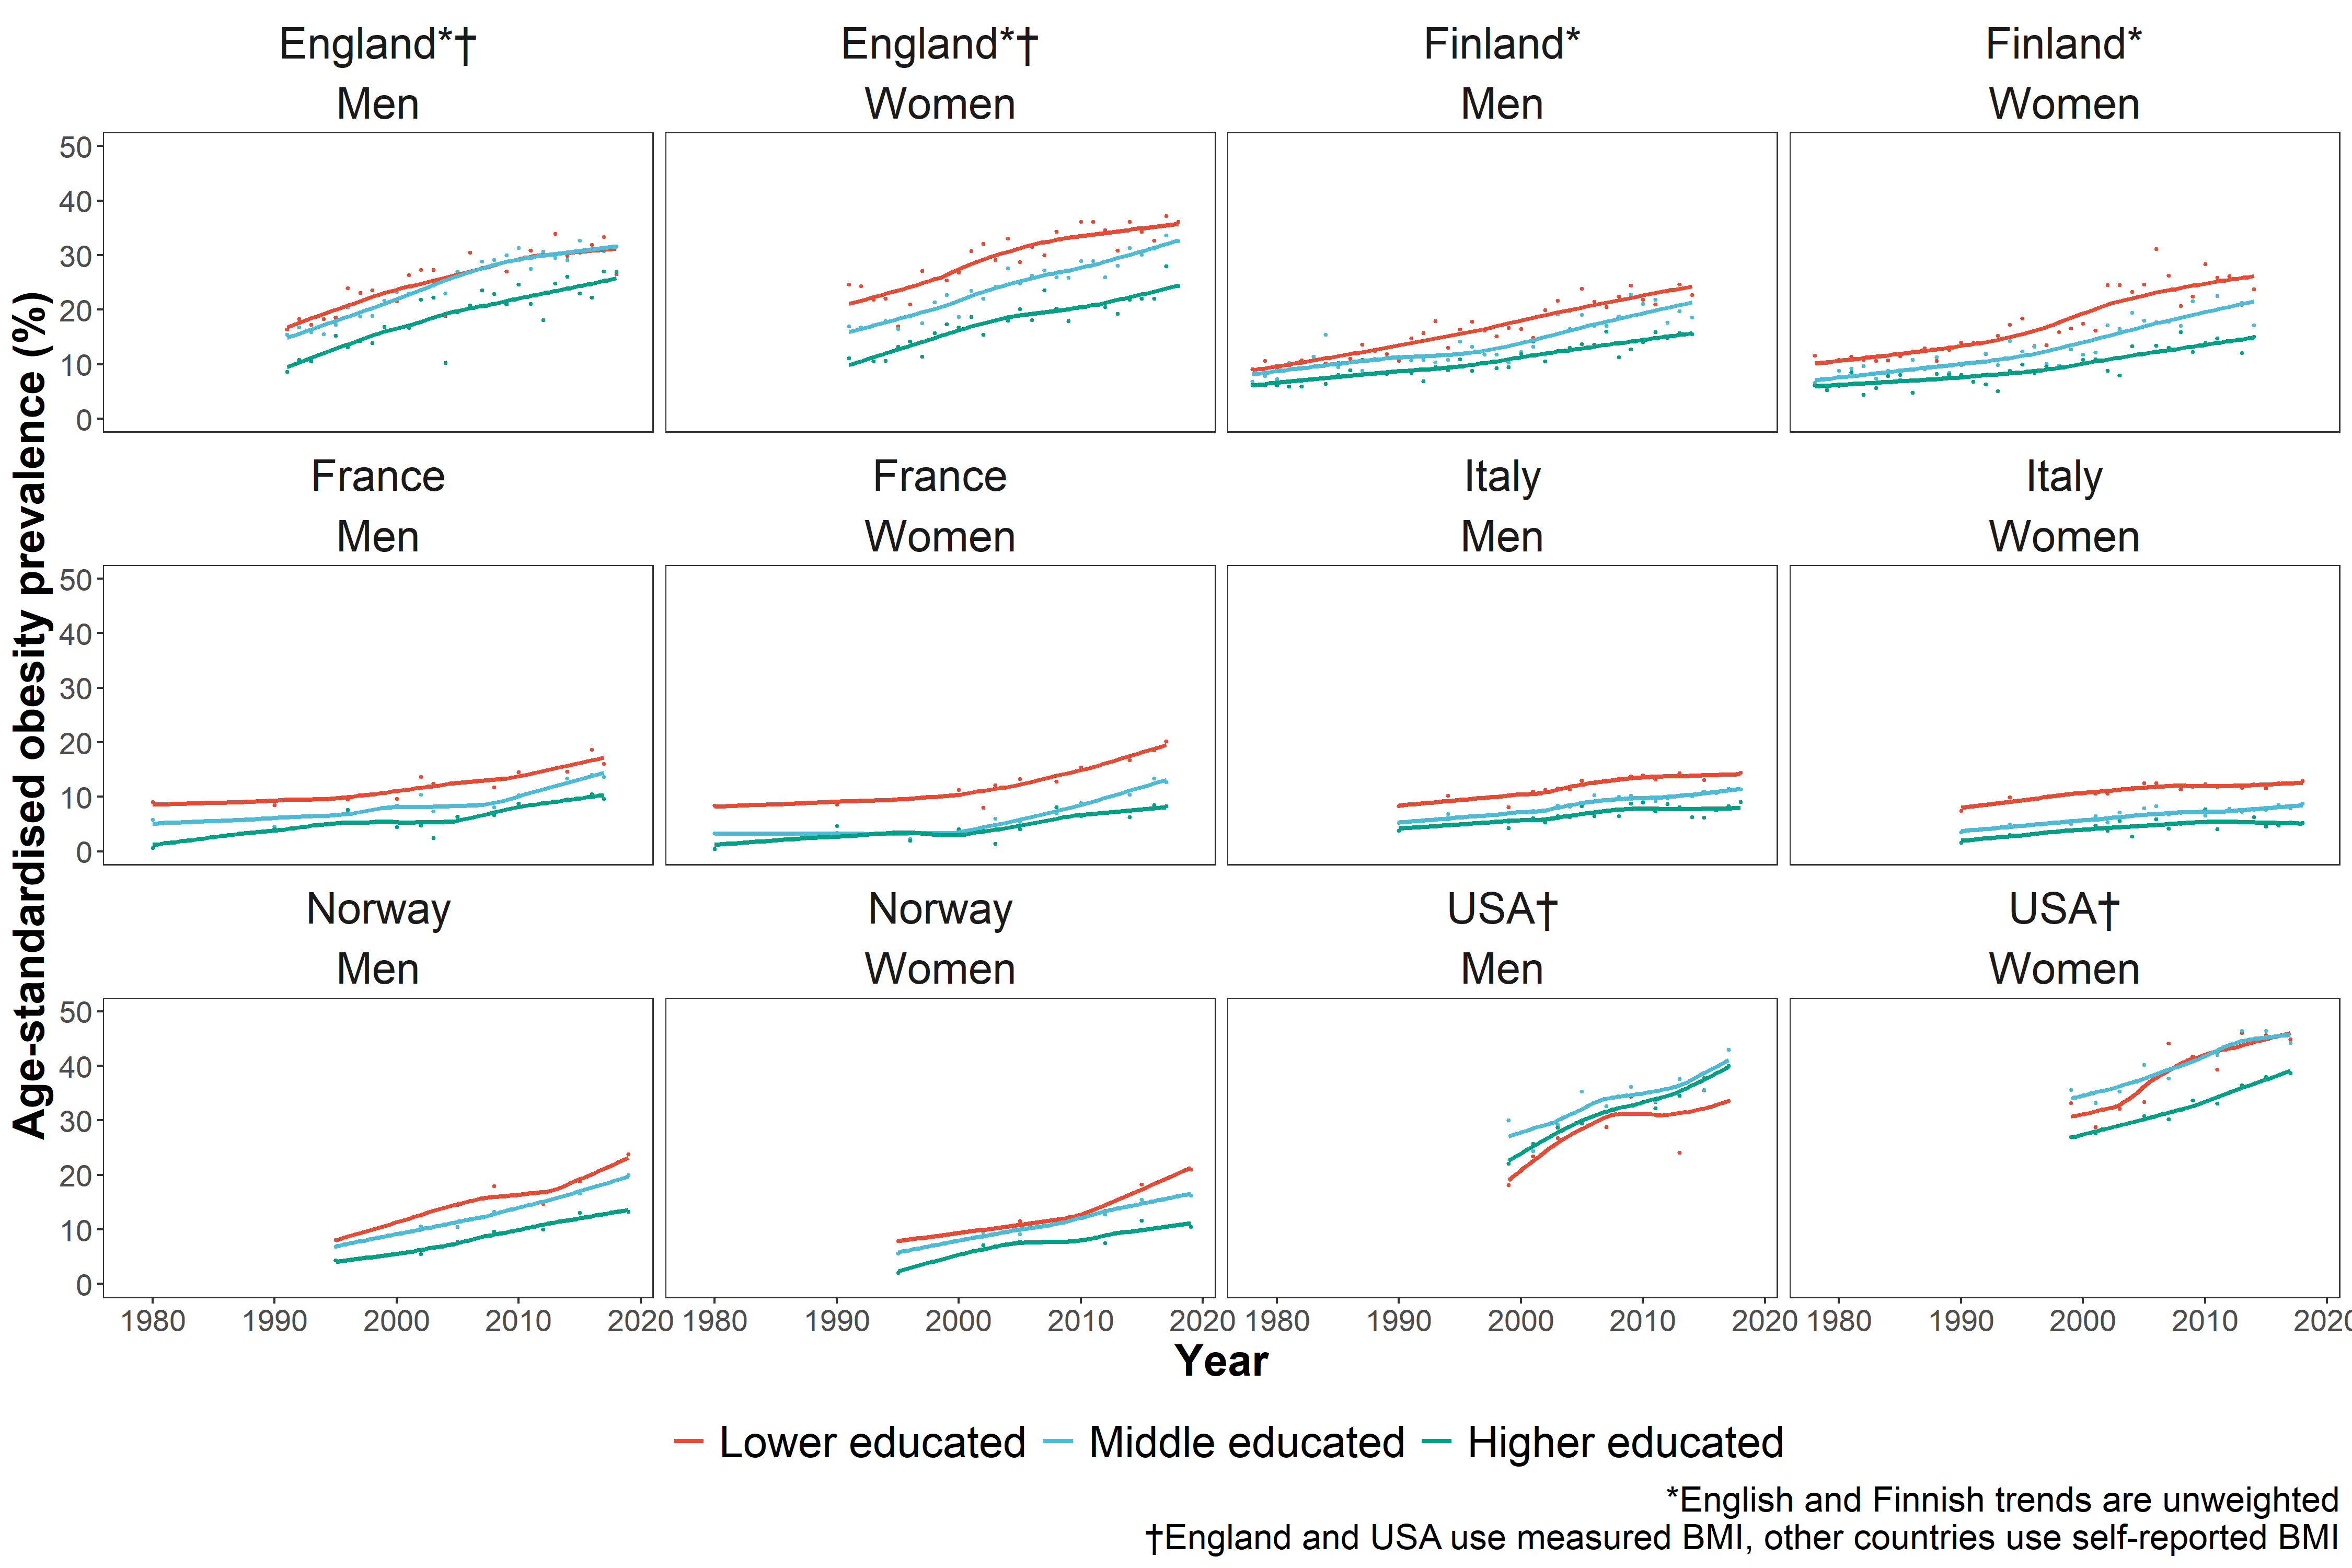
**
